# Supplementary material
Source: publisher figshare collection journal article supplement (https://acs.figshare.com/ndownloader/files/4659037)
Supplement: Supplementary file 1 [file 4659037]

## SUPPORTING INFORMATION

### A Sustainable Colloidal-Silver-Impregnated Ceramic Filter for Point-of-Use Water Treatment

*Vinka A. Oyanedel-Craver and James A. Smith*

Department of Civil and Environmental Engineering, University of Virginia, P.O. Box  
400742, Charlottesville, VA 22904-4742, USA

The following is the list of additional supporting materials for the article:

Table S2-S2. Particle size, specific surface area, and predominant clay mineral for Guatemalan, Redart, and Mexican soils used to fabricate ceramic filters.

Table S3-S3. Colloidal silver masses applied to and retained by ceramic filters manufactured using each of three types of soil samples. Data are presented for both painted and submerged ceramic filters.

Figure S4-S4. Effluent [ $^3\text{H}$ ]H<sub>2</sub>O concentrations normalized to the influent pulse concentration as a function of time for ceramic filters, without silver impregnation, fabricated with Redart, Guatemalan, and Mexican soils. Solid lines represent optimized solute-transport model fits.

Figure S5-S5. Silver concentrations in effluent water from painted ceramic filters as a function of time.

Table S2-S2. Particle size, specific surface area, and predominant clay mineral for Guatemalan, Redart, and Mexican soils used to fabricate ceramic filters.

|                                        | Guatemala | Redart           | Mexico               |
|----------------------------------------|-----------|------------------|----------------------|
| Particle size (%)                      |           |                  |                      |
| < 2 $\mu\text{m}$                      | 10.1      | 30.7             | 13.6                 |
| 2-20 $\mu\text{m}$                     | 58.7      | 54.9             | 27.5                 |
| > 20 $\mu\text{m}$                     | 31.2      | 14.4             | 58.9                 |
| Surface area ( $\text{m}^2/\text{g}$ ) | 19.23     | 52.19            | 17.94                |
| Predominant mineral                    | Illite    | Illite/kaolinite | Mixed-layer material |

Table S3-S3. Colloidal silver masses applied to and retained by ceramic filters manufactured using each of three types of soil samples. Data are presented for both painted and submerged ceramic filters.

|                                                         | <b>Guatemala</b> | <b>Redart</b> | <b>Mexico</b> |
|---------------------------------------------------------|------------------|---------------|---------------|
| Painted ceramic filters                                 |                  |               |               |
| Total mass applied (mg colloidal silver/g)              | 0.035            | 0.037         | 0.033         |
| Mass after saturation period<br>(mg colloidal silver/g) | 0.028            | 0.036         | 0.029         |
| Submerged ceramic filters                               |                  |               |               |
| Total mass applied (mg colloidal silver/g)              | 0.26             | 0.25          | 0.26          |
| Mass after saturation period<br>(mg colloidal silver/g) | 0.208            | 0.223         | 0.223         |

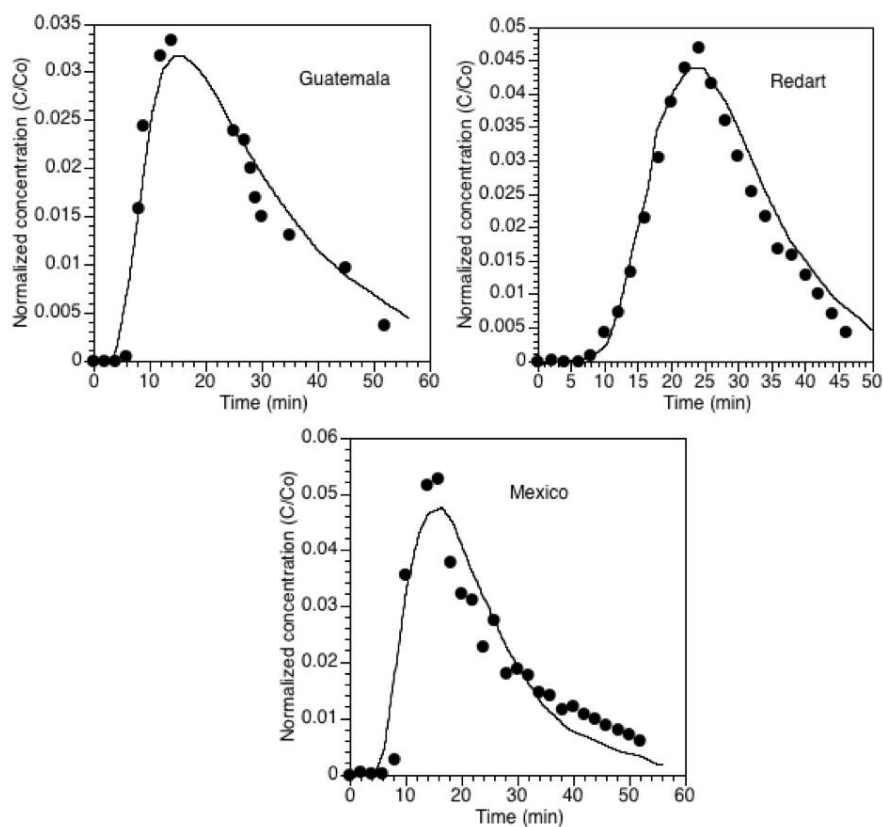

Figure S4-S4. Effluent  $[^3\text{H}]\text{H}_2\text{O}$  concentrations normalized to the influent pulse concentration as a function of time for ceramic filters fabricated with Redart, Guatemalan, and Mexican soils. Solid lines represent optimized solute-transport model fits.

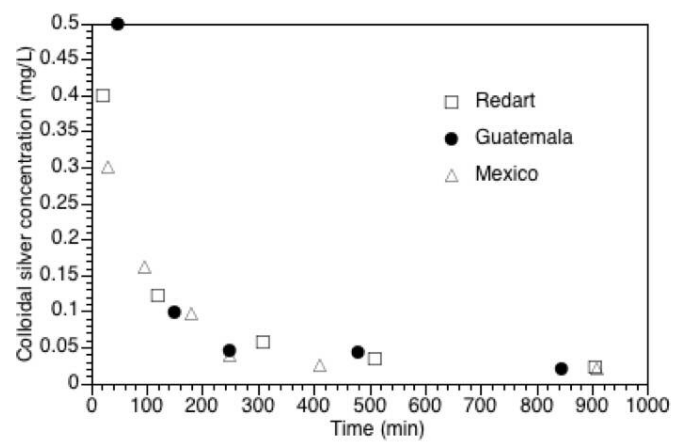

Figure S5-S5. Silver concentrations in effluent water from painted ceramic filters as a function of time.
